# Supplementary material
Source: PubMed Central journal article supplement (PMC9036616)
Supplement: NIHMS1795126-supplement-2.pdf [file NIHMS1795126-supplement-2.pdf]

# Supplemental Information

Replacement per- and polyfluoroalkyl substances (PFAS) are potent modulators of lipogenic and drug metabolizing gene expression signatures in primary human hepatocytes

Emily Marques<sup>†</sup>, Marisa Pfohl<sup>†</sup>, Wei Wei<sup>†</sup>, Giuseppe Tarantola<sup>†</sup>, Lucie Ford<sup>¶</sup>, Ogochukwu Amaeze<sup>§</sup>, Jessica Alesio<sup>^</sup>, Sangwoo Ryu<sup>^</sup>, Xuelian Jia<sup>α</sup>, Hao Zhu<sup>αβ</sup>, Geoffrey D. Bothun<sup>^</sup>, and Angela Slitt<sup>†\*</sup>

<sup>†</sup> Department of Biomedical and Pharmaceutical Sciences, University of Rhode Island, Kingston, RI, USA

<sup>¶</sup> Department of Biology and Biomedical Sciences, Salve Regina University, Newport, RI 02840, USA

<sup>§</sup> Department of Clinical Pharmacy & Biopharmacy, Faculty of Pharmacy, University of Lagos, Nigeria

<sup>α</sup> The Rutgers Center for Computational and Integrative Biology, Camden, New Jersey, USA

<sup>β</sup> Department of Chemistry, Rutgers University, Camden, New Jersey, USA

<sup>^</sup> Department of Chemical Engineering, University of Rhode Island, Kingston, RI, USA

\*Corresponding author: Dr. Angela Slitt, Email: [angela\\_slitt@uri.edu](mailto:angela_slitt@uri.edu)

## **List of the supporting information**

**Supplemental Table 1.** Human and Environmental Exposure to per- and polyfluoroalkyl substances (PFAS). Page S2

**Supplemental Table 2.** PFAS information used for hepatocytes treatments. Page S6

**Supplemental Table 3.** The details of 36 modeling sets shown by classifications and relevant thresholds. Page S8

**Supplemental Table 4.** Model performance for all endpoints using five-fold cross validation. Page S10

**Supplemental Scheme 1.** Map detailing relationship of measured gene targets and hepatic steatosis. Page S11

**Supplemental Figure 1.** Cell viability assay. Page S12

**Supplemental Figure 2.** Relationship of lipid accumulation and gene expression trends with albumin protein binding. Page S13

**Supplemental Table 1.** Human and Environmental Exposure to per- and polyfluoroalkyl substances (PFAS)

| <b>PFAS</b>   | <b>Human Half- Life</b> | <b>Detections in Human Blood/Serum</b> | <b>Detections in Human Liver</b> | <b>Detections in Environmental Exposed Animal Liver</b> | <b>Detections in Environmental (Soil/Water/Air)</b> |
|---------------|-------------------------|----------------------------------------|----------------------------------|---------------------------------------------------------|-----------------------------------------------------|
| PFBS (C4s)    | 25.8 days <sup>1</sup>  | 2-5                                    | 6                                | 7,8                                                     | 9-12                                                |
| PFHxS (C6s)   | 8.5 years <sup>13</sup> | 2-5,14                                 | 6,14,15                          | 7,8,16,17                                               | 7,9-12,18                                           |
| PFOS (C8s)    | 5.4 years <sup>13</sup> | 2-5,14                                 | 6,14,15                          | 7,8,16,17,19,20                                         | 7,9-12,18,21                                        |
| PFBA (C4)     | 75 hours <sup>22</sup>  | 3                                      | 6                                | 7,8                                                     | 7,9,11,21                                           |
| PFPeA (C5)    | Unknown                 | 3                                      | 6                                | 7,8                                                     | 7,9,11,12,21                                        |
| PFHxA (C6)    | 32 days <sup>23</sup>   | 3                                      | 6                                | 7,8                                                     | 7,9,11,12,21                                        |
| PFHpA (C7)    | 1.5 years <sup>24</sup> | 2-5,14                                 | 6,14                             | 7,8                                                     | 7,9-12,21                                           |
| PFOA (C8)     | 3.8 years <sup>13</sup> | 2-5,14                                 | 6,14,15                          | 7,8,16,17,19                                            | 7,9-12,18,21                                        |
| PFNA (C9)     | 4.3 years <sup>24</sup> | 2-5,14                                 | 6,14,15                          | 7,8,16,19                                               | 7,9-12,18,21                                        |
| PFDA (C10)    | 12 years <sup>24</sup>  | 2-5,14                                 | 14,15                            | 7,8,16,17,19,20                                         | 7,9,11,12,18,21                                     |
| PFUnDA (C11)  | 12 years <sup>24</sup>  | 2-5,14                                 | 14,15                            | 7,16,17,19,20                                           | 7,9,12,18,21                                        |
| PFDoDA (C12)  | Unknown                 | 3,5,14                                 | 6,14                             | 7,8,16,17,19,20                                         | 7,9,12,18,21                                        |
| PFTTrDA (C13) | Unknown                 | 5                                      | 6                                | 7,16,17,19                                              | 9,12,21                                             |
| PFTeDA (C14)  | Unknown                 |                                        |                                  | 7,16,19,20                                              | 9,12,21                                             |

|                          |         |        |          |         |
|--------------------------|---------|--------|----------|---------|
| HFPO-DA (GenX, PFPrOPrA) | Unknown | 7      | 7,25     | 7,11    |
| 6:2 FTS                  | Unknown | 26     | 20       | 9,18    |
| FOSA                     | Unknown | 2–5,26 | 16,17,19 | 9,12,18 |
| MetFOSA                  | Unknown |        |          | 9,12    |
| EtFOSA                   | Unknown | 5      |          | 9,12,18 |

---

## References

- (1) Olsen, G. W.; Chang, S.-C.; Noker, P. E.; Gorman, G. S.; Ehresman, D. J.; Lieder, P. H.; Butenhoff, J. L. A Comparison of the Pharmacokinetics of Perfluorobutanesulfonate (PFBS) in Rats, Monkeys, and Humans. *Toxicology* **2009**, *256* (1), 65–74. <https://doi.org/10.1016/j.tox.2008.11.008>.
- (2) Kato, K.; Wong, L.-Y.; Jia, L. T.; Kuklennyik, Z.; Calafat, A. M. Trends in Exposure to Polyfluoroalkyl Chemicals in the U.S. Population: 1999–2008. *Environ. Sci. Technol.* **2011**, *45* (19), 8037–8045. <https://doi.org/10.1021/es1043613>.
- (3) Dassuncao, C.; Hu, X. C.; Nielsen, F.; Weihe, P.; Grandjean, P.; Sunderland, E. M. Shifting Global Exposures to Poly- and Perfluoroalkyl Substances (PFASs) Evident in Longitudinal Birth Cohorts from a Seafood-Consuming Population. *Environ. Sci. Technol.* **2018**, *52* (6), 3738–3747. <https://doi.org/10.1021/acs.est.7b06044>.
- (4) Glynn, A.; Berger, U.; Bignert, A.; Ullah, S.; Aune, M.; Lignell, S.; Darnerud, P. O. Perfluorinated Alkyl Acids in Blood Serum from Primiparous Women in Sweden: Serial Sampling during Pregnancy and Nursing, And Temporal Trends 1996–2010. *Environ. Sci. Technol.* **2012**, *46* (16), 9071–9079. <https://doi.org/10.1021/es301168c>.
- (5) Gebbink, W. A.; Glynn, A.; Berger, U. Temporal Changes (1997–2012) of Perfluoroalkyl Acids and Selected Precursors (Including Isomers) in Swedish Human Serum. *Environmental Pollution* **2015**, *199*, 166–173. <https://doi.org/10.1016/j.envpol.2015.01.024>.
- (6) Pérez, F.; Nadal, M.; Navarro-Ortega, A.; Fàbrega, F.; Domingo, J. L.; Barceló, D.; Farré, M. Accumulation of Perfluoroalkyl Substances in Human Tissues. *Environment International* **2013**, *59*, 354–362. <https://doi.org/10.1016/j.envint.2013.06.004>.
- (7) Pan, Y.; Zhang, H.; Cui, Q.; Sheng, N.; Yeung, L. W. Y.; Guo, Y.; Sun, Y.; Dai, J. First Report on the Occurrence and Bioaccumulation of Hexafluoropropylene Oxide Trimer Acid: An Emerging Concern. *Environ. Sci. Technol.* **2017**, *51* (17), 9553–9560. <https://doi.org/10.1021/acs.est.7b02259>.

- (8) Falk, S.; Brunn, H.; Schröter-Kermani, C.; Failing, K.; Georgii, S.; Tarricone, K.; Stahl, T. Temporal and Spatial Trends of Perfluoroalkyl Substances in Liver of Roe Deer (*Capreolus Capreolus*). *Environmental Pollution* **2012**, *171*, 1–8. <https://doi.org/10.1016/j.envpol.2012.07.022>.
- (9) Ahrens, L.; Harner, T.; Shoeib, M.; Lane, D. A.; Murphy, J. G. Improved Characterization of Gas–Particle Partitioning for Per- and Polyfluoroalkyl Substances in the Atmosphere Using Annular Diffusion Denuder Samplers. *Environ. Sci. Technol.* **2012**, *46* (13), 7199–7206. <https://doi.org/10.1021/es300898s>.
- (10) Hu, X. C.; Andrews, D. Q.; Lindstrom, A. B.; Bruton, T. A.; Schaider, L. A.; Grandjean, P.; Lohmann, R.; Carignan, C. C.; Blum, A.; Balan, S. A.; Higgins, C. P.; Sunderland, E. M. Detection of Poly- and Perfluoroalkyl Substances (PFASs) in U.S. Drinking Water Linked to Industrial Sites, Military Fire Training Areas, and Wastewater Treatment Plants. *Environ Sci Technol Lett* **2016**, *3* (10), 344–350. <https://doi.org/10.1021/acs.estlett.6b00260>.
- (11) Sun, M.; Arevalo, E.; Strynar, M.; Lindstrom, A.; Richardson, M.; Kearns, B.; Pickett, A.; Smith, C.; Knappe, D. R. U. Legacy and Emerging Perfluoroalkyl Substances Are Important Drinking Water Contaminants in the Cape Fear River Watershed of North Carolina. *Environ. Sci. Technol. Lett.* **2016**, *3* (12), 415–419. <https://doi.org/10.1021/acs.estlett.6b00398>.
- (12) Wild, S.; McLagan, D.; Schlabach, M.; Bossi, R.; Hawker, D.; Cropp, R.; King, C. K.; Stark, J. S.; Mondon, J.; Nash, S. B. An Antarctic Research Station as a Source of Brominated and Perfluorinated Persistent Organic Pollutants to the Local Environment. *Environ. Sci. Technol.* **2015**, *49* (1), 103–112. <https://doi.org/10.1021/es5048232>.
- (13) Olsen, G. W.; Burris, J. M.; Ehresman, D. J.; Froehlich, J. W.; Seacat, A. M.; Butenhoff, J. L.; Zobel, L. R. Half-Life of Serum Elimination of Perfluorooctanesulfonate, Perfluorohexanesulfonate, and Perfluorooctanoate in Retired Fluorochemical Production Workers. *Environ Health Perspect* **2007**, *115* (9), 1298–1305. <https://doi.org/10.1289/ehp.10009>.
- (14) Yeung, L. W. Y.; Guruge, K. S.; Taniyasu, S.; Yamashita, N.; Angus, P. W.; Herath, C. B. Profiles of Perfluoroalkyl Substances in the Liver and Serum of Patients with Liver Cancer and Cirrhosis in Australia. *Ecotoxicology and Environmental Safety* **2013**, *96*, 139–146. <https://doi.org/10.1016/j.ecoenv.2013.06.006>.
- (15) Kärman, A.; Domingo, J. L.; Llebaria, X.; Nadal, M.; Bigas, E.; van Bavel, B.; Lindström, G. Biomonitoring Perfluorinated Compounds in Catalonia, Spain: Concentrations and Trends in Human Liver and Milk Samples. *Environ Sci Pollut Res* **2010**, *17* (3), 750–758. <https://doi.org/10.1007/s11356-009-0178-5>.
- (16) Huber, S.; Ahrens, L.; Bårdsen, B.-J.; Siebert, U.; Bustnes, J. O.; Vikingsson, G. A.; Ebinghaus, R.; Herzke, D. Temporal Trends and Spatial Differences of Perfluoroalkylated Substances in Livers of Harbor Porpoise (*Phocoena Phocoena*) Populations from Northern Europe, 1991–2008. *Science of The Total Environment* **2012**, *419*, 216–224. <https://doi.org/10.1016/j.scitotenv.2011.12.050>.
- (17) Valdernes, S.; Nilsen, B. M.; Breivik, J. F.; Borge, A.; Maage, A. Geographical Trends of PFAS in Cod Livers along the Norwegian Coast. *PLoS One* **2017**, *12* (5). <https://doi.org/10.1371/journal.pone.0177947>.

- (18) Nguyen, T. V.; Reinhard, M.; Chen, H.; Gin, K. Y.-H. Fate and Transport of Perfluoro- and Polyfluoroalkyl Substances Including Perfluorooctane Sulfonamides in a Managed Urban Water Body. *Environ Sci Pollut Res* **2016**, *23* (11), 10382–10392. <https://doi.org/10.1007/s11356-016-6788-9>.
- (19) Pan, C.-G.; Zhao, J.-L.; Liu, Y.-S.; Zhang, Q.-Q.; Chen, Z.-F.; Lai, H.-J.; Peng, F.-J.; Liu, S.-S.; Ying, G.-G. Bioaccumulation and Risk Assessment of Per- and Polyfluoroalkyl Substances in Wild Freshwater Fish from Rivers in the Pearl River Delta Region, South China. *Ecotoxicology and Environmental Safety* **2014**, *107*, 192–199. <https://doi.org/10.1016/j.ecoenv.2014.05.031>.
- (20) Oakes, K. D.; Benskin, J. P.; Martin, J. W.; Ings, J. S.; Heinrichs, J. Y.; Dixon, D. G.; Servos, M. R. Biomonitoring of Perfluorochemicals and Toxicity to the Downstream Fish Community of Etobicoke Creek Following Deployment of Aqueous Film-Forming Foam. *Aquatic Toxicology* **2010**, *98* (2), 120–129. <https://doi.org/10.1016/j.aquatox.2010.02.005>.
- (21) Qi, Y.; Huo, S.; Xi, B.; Hu, S.; Zhang, J.; He, Z. Spatial Distribution and Source Apportionment of PFASs in Surface Sediments from Five Lake Regions, China. *Sci Rep* **2016**, *6*. <https://doi.org/10.1038/srep22674>.
- (22) Chang, S.-C.; Das, K.; Ehresman, D. J.; Ellefson, M. E.; Gorman, G. S.; Hart, J. A.; Noker, P. E.; Tan, Y.-M.; Lieder, P. H.; Lau, C.; Olsen, G. W.; Butenhoff, J. L. Comparative Pharmacokinetics of Perfluorobutyrate in Rats, Mice, Monkeys, and Humans and Relevance to Human Exposure via Drinking Water. *Toxicol Sci* **2008**, *104* (1), 40–53. <https://doi.org/10.1093/toxsci/kfn057>.
- (23) Russell, M. H.; Nilsson, H.; Buck, R. C. Elimination Kinetics of Perfluorohexanoic Acid in Humans and Comparison with Mouse, Rat and Monkey. *Chemosphere* **2013**, *93* (10), 2419–2425. <https://doi.org/10.1016/j.chemosphere.2013.08.060>.
- (24) Zhang, Y.; Beesoon, S.; Zhu, L.; Martin, J. W. Biomonitoring of Perfluoroalkyl Acids in Human Urine and Estimates of Biological Half-Life. *Environ. Sci. Technol.* **2013**, *47* (18), 10619–10627. <https://doi.org/10.1021/es401905e>.
- (25) Cui, Q.; Pan, Y.; Zhang, H.; Sheng, N.; Wang, J.; Guo, Y.; Dai, J. Occurrence and Tissue Distribution of Novel Perfluoroether Carboxylic and Sulfonic Acids and Legacy Per/Polyfluoroalkyl Substances in Black-Spotted Frog (*Pelophylax nigromaculatus*). *Environ. Sci. Technol.* **2018**, *52* (3), 982–990. <https://doi.org/10.1021/acs.est.7b03662>.
- (26) Yang, L.; Wang, Z.; Shi, Y.; Li, J.; Wang, Y.; Zhao, Y.; Wu, Y.; Cai, Z. Human Placental Transfer of Perfluoroalkyl Acid Precursors: Levels and Profiles in Paired Maternal and Cord Serum. *Chemosphere* **2016**, *144*, 1631–1638. <https://doi.org/10.1016/j.chemosphere.2015.10.063>.

**Supplemental Table 2.** PFAS information used for hepatocytes treatments

| <b>PFAS</b>                             | <b>Chemical name</b>                                  | <b>CAS #</b>   | <b>Purity (%)</b> | <b>Catalog# (Lot)</b>    |
|-----------------------------------------|-------------------------------------------------------|----------------|-------------------|--------------------------|
| <b>PFBS (C4s)</b>                       | Perfluorobutane sulfonic acid                         | 375-73-5       | 100               | S-74451<br>(27461)       |
| <b>PFHxS (C6s)</b>                      | Potassium<br>perfluorohexanesulfonate                 | 3871-99-6      | 98                | S-17292M<br>(21279)      |
| <b>PFOS (C8s)</b>                       | Potassium<br>perfluorooctanesulfonate                 | 2795-39-3      | 98                | PFOS-002N<br>(24187)     |
| <b>PFBA (C4)</b>                        | Perfluorobutanoic acid                                | 375-224        | 98                | S-17292K<br>(21247)      |
| <b>PFPeA (C5)</b>                       | Perfluoropentanoic acid                               | 2706-90-3      | 97.0              | S-17292A<br>(21240)      |
| <b>PFHxA (C6)</b>                       | Perfluorohexanoic acid                                | 307-24-2       | 97.0              | S-17292B<br>(21241)      |
| <b>PFHpA (C7)</b>                       | Perfluoroheptanoic acid                               | 375-85-9       | 99.0              | S-17292C<br>(21242)      |
| <b>PFOA (C8)</b>                        | Perfluorooctanoic acid                                | 335-67-1       | 100.0             | PFOA-<br>001N<br>(27462) |
| <b>PFNA (C9)</b>                        | Perfluorononanoic acid                                | 375-95-1       | 97.0              | S-17292E<br>(21243)      |
| <b>PFDA (C10)</b>                       | Perfluorodecanoic acid                                | 335-76-2       | 98.0              | S-17292F<br>(21244)      |
| <b>PFUnDA (C11)</b>                     | Perfluoroundecanoic acid                              | 2058-94-8      | 95.0              | S-17292G<br>(21245)      |
| <b>PFDoDA (C12)</b>                     | Perfluorododecanoic acid                              | 307-55-1       | 95.0              | S-17292H<br>(21246)      |
| <b>PFTTrDA (C13)</b>                    | Perfluorotridecanoic acid                             | 72629-94-<br>8 | 100.0             | S-27319-03<br>(27641-01) |
| <b>PFTeDA (C14)</b>                     | Perfluorotetradecanoic acid                           | 376-06-7       | 97.0              | S-27319-02<br>(27490-01) |
| <b>HFPO-DA<br/>(GenX,<br/>PFPrOPrA)</b> | Perfluoro(2-methyl-3-<br>oxahexanoic) acid            | 13252-13-<br>6 | 95.7              | S-17292T<br>(28563)      |
| <b>FOSA</b>                             | Perfluorooctane sulfonamide                           | 754-91-6       | 95.3              | S-72644-05<br>(27475-01) |
| <b>MetFOSA</b>                          | N-Methyl perfluoro-1-<br>octanesulfonamide            | 31506-32-<br>8 | 95.9              | S-72644-06<br>(29478)    |
| <b>EtFOSA</b>                           | N-Ethyl perfluoro-1-<br>octanesulfonamide             | 4151-50-2      | 97.1              | S-72644-07<br>(29479)    |
| <b>6:2 FTS</b>                          | 1H, 1H, 2H, 2H-Perfluorooctane<br>sulfonic acid (6:2) | 27619-97-<br>2 | 99.2              | S-72644-04<br>(27468-01) |

Complete list of per- and polyfluoroalkyl substances (PFAS) that were purchased from AccuStandard Inc. (New Haven, CT, USA) for use in our assays.

**Supplemental Table 3.** The details of 36 modeling sets shown by classifications and relevant thresholds.

| Endpoint           | Thresholds* | Inactives | Actives  | Endpoint        | Thresholds* | Inactives | Actives   |
|--------------------|-------------|-----------|----------|-----------------|-------------|-----------|-----------|
| Lipid accumulation | 1.25        | 9         | 10       | FASN            | 1.2         | 10        | 9         |
| NR113              | 1.45        | 10        | 9        | <u>CYP2B6**</u> | <u>1.5</u>  | <u>4</u>  | <u>15</u> |
| ABCA1              | 1.35        | 10        | 9        | FABP1           | 1.02        | 9         | 10        |
| CIDEA              | 1           | 14        | 5        | CPT1B1          | 1           | 12        | 7         |
| SOD1               | 1.23        | 9         | 10       | SLC27A1         | 1.17        | 8         | 11        |
| GSTM3              | 1.2         | 11        | 8        | UGT1A1          | 1.2         | 10        | 9         |
| SULT2A1            | 1.5         | 7         | 12       | GSTA1           | 1.1         | 9         | 10        |
| SLCO1B1            | 1.2         | 10        | 9        | EHHADH          | 1.25        | 9         | 10        |
| MT-RNR2            | 1           | 14        | 5        | HMGCS1          | 1.35        | 10        | 9         |
| BDH2               | 1.16        | 10        | 9        | ACOT2           | 1.25        | 10        | 9         |
| CYP4A11            | 1.1         | 8         | 11       | PCK2            | 1.3         | 8         | 11        |
| LPL                | 1           | 8         | 11       | NR1L2           | 1.27        | 9         | 10        |
| CYP7A1             | 1.1         | 8         | 11       | SCD             | 1.4         | 8         | 11        |
| <u>SAA1**</u>      | <u>1</u>    | <u>15</u> | <u>4</u> | MTTP            | 1.3         | 10        | 9         |
| PPAR- $\alpha$     | 1.17        | 9         | 10       | GPAM            | 1.41        | 9         | 10        |
| NFE2L2             | 1.2         | 10        | 9        | CD36            | 1.2         | 8         | 11        |
| FABP4              | 1.2         | 11        | 8        | PPAR- $\gamma$  | 1.3         | 9         | 10        |
| NQO1               | 1.23        | 9         | 10       | SREBF1          | 1.3         | 9         | 10        |

\*A PFAS was defined as “inactive” when the fold change of relevant gene expression was less than or equal to the threshold value or defined as “active” when the fold change is larger than the



threshold. The threshold value was defined 1) between 1 and 1.5 for all the endpoints and 2) to balance the two classifications of PFASs. \*\* For SAA1, the number of actives is less than five, for CYP2B6, the number of inactives is less than five, using the above threshold criterion. Both of these two endpoints were excluded for modeling because the minimum requirement of a classification for modeling is five.

**Supplemental Table 4.** Model performance for all endpoints using five-fold cross validation.

| Endpoint           | Algorithm   | Descriptor | CCR  | Endpoint       | Algorithm   | Descriptor | CCR  |
|--------------------|-------------|------------|------|----------------|-------------|------------|------|
| Lipid accumulation | SVM         | Dragon     | 0.79 | FASN           | RF          | Dragon     | 0.68 |
| NR1H3              | RF          | Dragon     | 0.79 | CYP2B6         | -           | -          | -    |
| ABCA1              | SVM         | RDKit      | 0.68 | FABP1          | SVM         | RDKit      | 0.69 |
| CIDEA              | SVM         | RDKit      | 0.66 | CPT1B1         | SVM         | Dragon     | 0.70 |
| SOD1               | <i>k</i> NN | Dragon     | 0.79 | SLC27A1        | RF          | FCFP6      | 0.63 |
| GSTM3              | <i>k</i> NN | Dragon     | 0.77 | UGT1A1         | SVM         | Dragon     | 0.84 |
| SULT2A1            | SVM         | RDKit      | 0.83 | GSTA1          | <i>k</i> NN | Dragon     | 0.74 |
| SLCO1B1            | <i>k</i> NN | Dragon     | 0.84 | EHHADH         | RF          | RDKit      | 0.74 |
| MT-RNR2            | SVM         | RDKit      | 0.66 | HMGCS1         | SVM         | Dragon     | 0.64 |
| BDH2               | <i>k</i> NN | Dragon     | 0.63 | ACOT2          | SVM         | Dragon     | 0.84 |
| CYP4A11            | SVM         | Dragon     | 0.91 | PCK2           | SVM         | Dragon     | 0.79 |
| LPL                | RF          | Dragon     | 0.70 | NR1L2          | SVM         | Dragon     | 0.78 |
| CYP7A1             | SVM         | RDKit      | 0.83 | SCD            | RF          | RDKit      | 0.71 |
| SAA1               | -           | -          | -    | MTTP           | SVM         | Dragon     | 0.84 |
| PPAR- $\alpha$     | RF          | RDKit      | 0.68 | GPAM           | RF          | RDKit      | 0.74 |
| NFE2L2             | SVM         | Dragon     | 0.79 | CD36           | SVM         | Dragon     | 0.63 |
| FABP4              | <i>k</i> NN | RDKit      | 0.63 | PPAR- $\gamma$ | SVM         | RDKit      | 0.74 |
| NQO1               | SVM         | Dragon     | 0.73 | SREBF1         | SVM         | RDKit      | 0.79 |

**Supplemental Scheme 1.** Map detailing relationship of measured gene targets and hepatic steatosis.

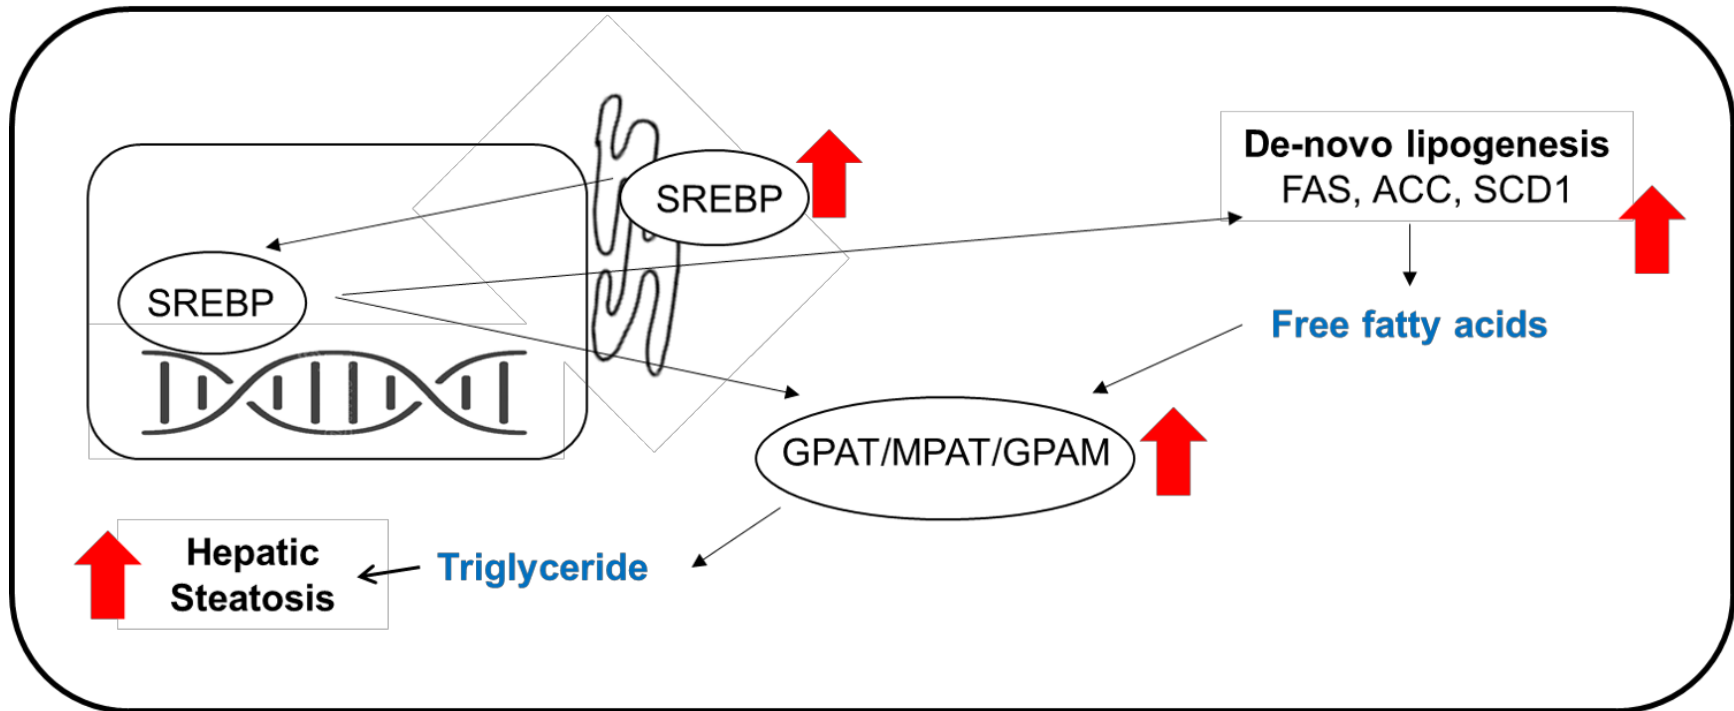

Red arrows indicate hypothesized mechanism of lipid accumulation and hepatic steatosis observed in hepatocytes, by induction of sterol regulatory element-binding protein (SREBP) and lipid synthesis and storage genes.

**Supplemental Figure 1.** Cell viability assay.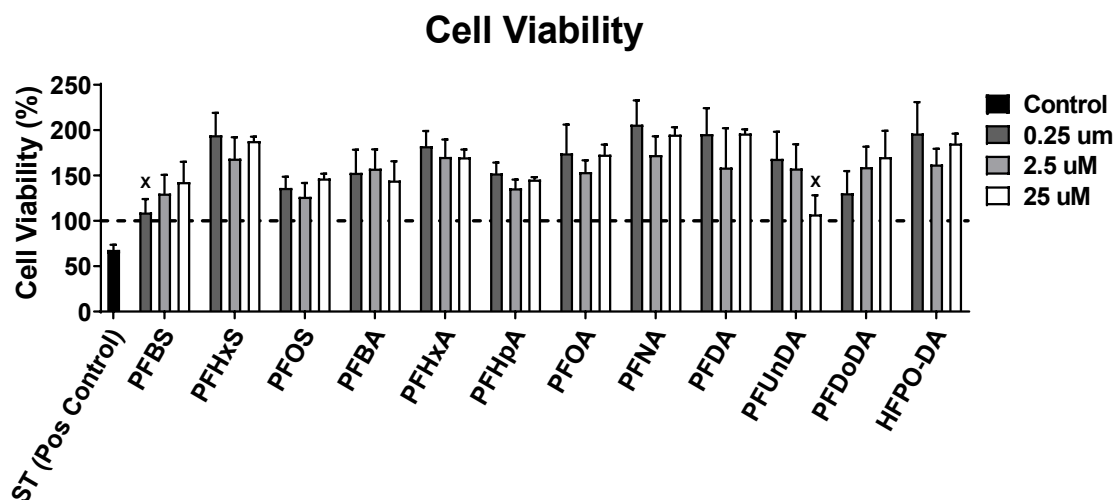

Human hepatocytes were treated with various PFAS (0.25-25  $\mu$ M) and 1  $\mu$ M of staurosporine (ST; positive control for cytotoxicity) in 0.1% DMSO in media for 48 hours. The CellTiter-Glo Luminescent Cell Viability Assay reagent (Promega Corporation, Madison, WI) was added to wells according to manufacturer's protocol and luminescence was evaluated on a GloMax 96 microplate luminometer (Promega Corporation, Madison, WI). Percent cell viability was calculated compared to DMSO vehicle controls. Staurosporine reduced cell viability to 68%, while all PFAS treatments, except for 0.25  $\mu$ M PFBS and 25  $\mu$ M PFUnDA, significantly increased cell viability ( $p < 0.05$ ). This increase in ATP is likely due to induction of peroxisomal beta-oxidation pathway through activation of peroxisome proliferator-activated receptors (PPAR) that has been observed with many of these PFAS compounds. Calculations were done using an ANOVA followed by Fisher's LSD test. All values are means  $\pm$  SEM; N = 4. "x" indicates no significant difference from DMSO controls.

**Supplemental Figure 2.** Relationship of lipid accumulation and gene expression trends with albumin protein binding

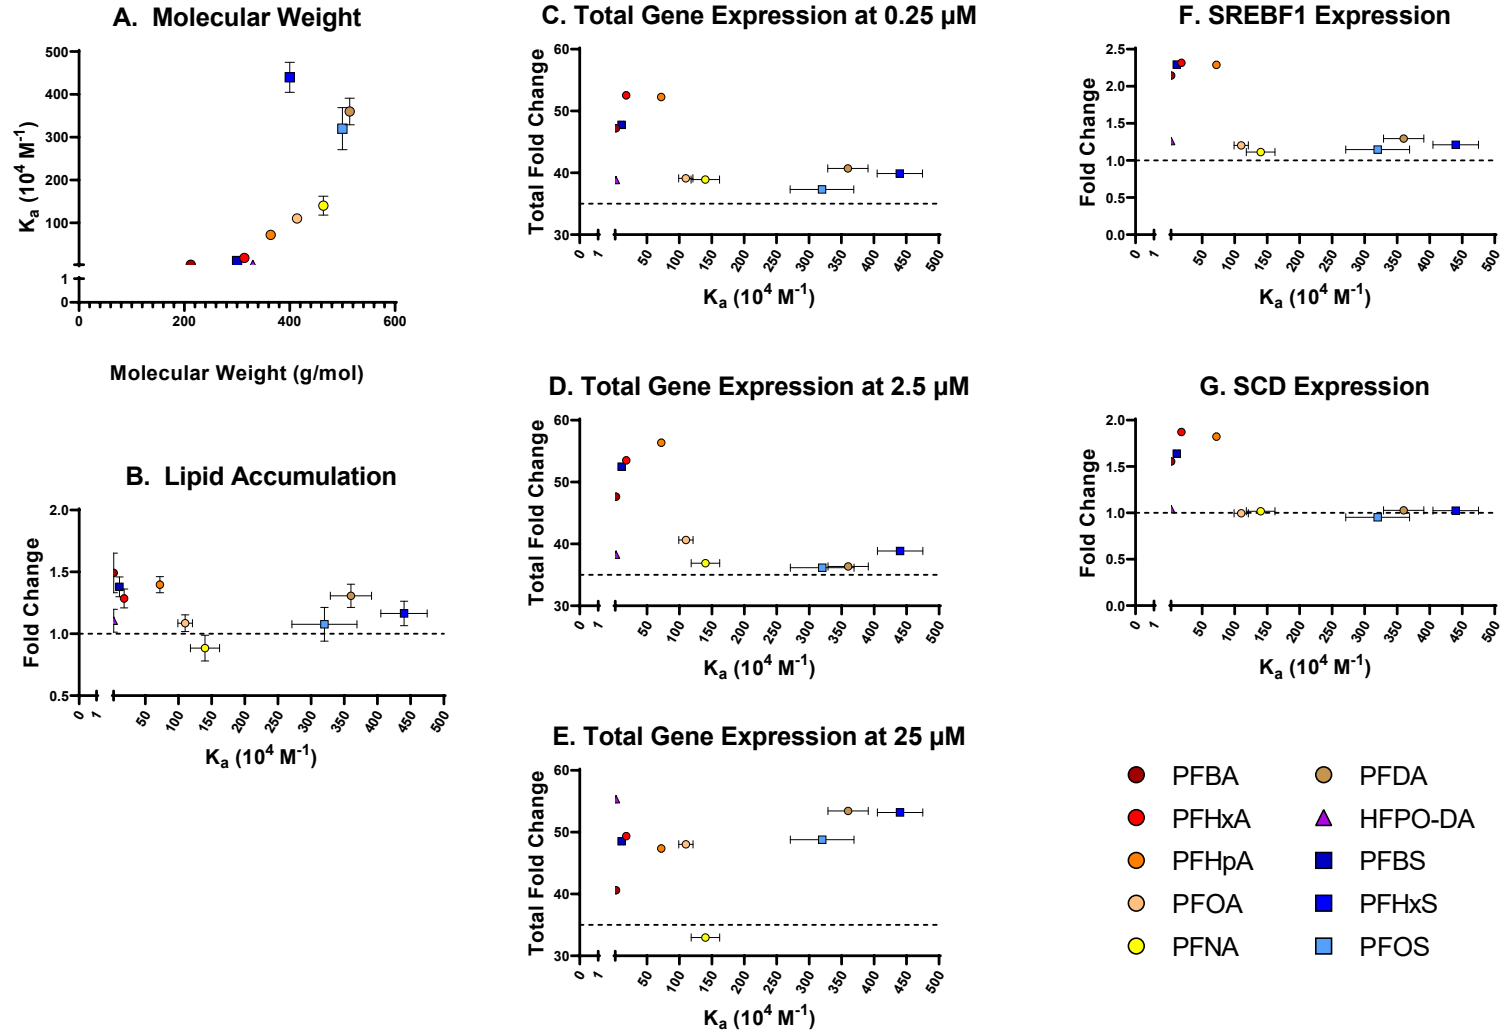

Protein binding association constants ( $K_a$ ) of several PFAS were determined using an equilibrium dialysis experiment conducted by Allendorf et al. (2019). All trends were calculated using bivariate Pearson correlation and are reported as (Pearson correlation coefficient, and P value). **(A)** As molecular weight was identified the strongest predictor of activity in our descriptor analysis,  $K_a$  was plotted and correlated with molecular weight (0.7401, 0.0142\*). **(B)** Lipid accumulation at 25  $\mu$ M plotted against  $K_a$  (-0.2962, 0.4060). Fold change of all 35 measured genes at 0.25  $\mu$ M (**C**; -0.5479, 0.1011), 2.5  $\mu$ M (**D**; -0.6200, 0.0558), and 25  $\mu$ M (**E**; 0.2781, 0.4366) were summed and plotted against  $K_a$  values. Similarly, fold change of key lipid synthesis gene targets, SREBF1 (**F**; -0.6221, 0.0548) and SCD (**G**; -0.6111, 0.0605), at 25  $\mu$ M were also plotted against  $K_a$  values.  $K_a$  values are means  $\pm$  SD, and all other values are means  $\pm$  SEM; N = 3-4.

Allendorf, F., Berger, U., Goss, K.U., Ulrich, N., 2019. Partition coefficients of four perfluoroalkyl acid alternatives between bovine serum albumin (BSA) and water in comparison to ten classical perfluoroalkyl acids. *Environ. Sci. Process. Impacts* 21, 1852–1863. <https://doi.org/10.1039/c9em00290a>
